# Supplementary material
Source: HighWire-hosted journal article supplement (https://ez-admanager.com/highwire/filestream/135067/field_highwire_adjunct_files/0/tehrani_169.pdf)
Supplement: tehrani_169.pdf [file tehrani_169.pdf]

# Pequeños infartos cerebrales que causan vértigo severo

Frecuencia de falsos negativos en RM y mecanismos no lacunares

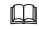

Ali S. Saber Tehrani, MD  
Jorge C. Kattah, MD,  
FAAN  
Georgios Mantokoudis,  
MD  
John H. Pula, MD  
Deepak Nair, MD  
Ari Blitz, MD  
Sarah Ying, MD  
Daniel F. Hanley, MD  
David S. Zee, MD  
David E. Newman-Toker,  
MD, PhD

Dirección para correspondencia al  
Dr. Newman-Toker:  
toker@jhu.edu

## RESUMEN

**Objetivo:** Describir las características de los pequeños infartos que causan síndrome vestibular agudo (SVA).

**Métodos:** Estudio ambispectivo de corte transversal de pacientes con SVA (vértigo agudo o mareos, nistagmo, náuseas/vómitos, intolerancia al movimiento cefálico, marcha inestable) con al menos un factor de riesgo para infarto desde 1999 al 2011 en un único centro de referencia de enfermedad cerebrovascular. A los pacientes se les realizó un examen HINTS "plus" no cuantitativo (impulso cefálico, nistagmo, test de skew más audición), una neuroimagen para confirmar diagnóstico (97% por RM) y una RM repetida en aquellos con un estudio inicial normal, pero signos clínicos de lesión central. Identificamos pacientes con infartos  $\leq 10$  mm de diámetro axial mediante la secuencia de difusión (DWI).

**Resultados:** De 190 presentaciones de SVA de alto riesgo (105 infartos), encontramos infartos pequeños en 15 pacientes (mediana de la edad 64 años, rango 41-85). La estructura vestibular más frecuentemente infartada fue el pedúnculo cerebeloso inferior (73%). La localización más frecuentemente afectada fue el bulbo lateral (60%). Sólo se encontraron signos neurológicos focales en el 27%. El examen HINTS "plus" identificó infartos pequeños con mayor sensibilidad que la RM-DWI temprana (100% vs 47%,  $p < 0,001$ ). Las RM iniciales (6-48 horas) con falsos negativos fueron más comunes en infartos pequeños que en infartos grandes (53% [ $n = 8/15$ ] vs 7,8% [ $n = 7/90$ ],  $p < 0,001$ ). Los mecanismos de infartos no lacunares fueron responsables en el 47%, incluyendo 6 oclusiones o disecciones de arteria vertebral.

**Conclusiones:** Los infartos pequeños que afectan las proyecciones vestibulares centrales pueden presentarse con un SVA aislado. La batería HINTS "plus" identifica a estos pacientes con mayor precisión que la RM-DWI temprana, que da falsos negativos en la mitad, hasta 48 horas después del inicio. Encontramos mecanismos no lacunares en la mitad, lo que sugiere un mayor riesgo del que podría asumirse en pacientes con este tipo de infartos pequeños. **Neurology**® 2014;83:169-173.

## GLOSARIO

**DE** = departamento de emergencia; **DWI** = *diffusion-weighted imaging* (secuencia de difusión); **HINTS** = *head impulse, nystagmus, test-of-skew* (impulso cefálico, nistagmo, test de skew más audición); **SVA** = síndrome vestibular agudo

El síndrome vestibular agudo (SVA) es un síndrome clínico bien definido<sup>1</sup> de vértigo continuo o mareos con náuseas o vómitos, intolerancia al movimiento cefálico, marcha inestable y nistagmo, de días a semanas de duración. El SVA constituye aproximadamente de un 10% a un 20% de los mareos en el departamento de emergencia (DE),<sup>2</sup> por lo que es responsable de aproximadamente 400.000 a 800.000 visitas anuales al DE en los EE UU.<sup>2,3</sup> El SVA puede ser causado por lesiones periféricas o centrales. Se estima que tal vez un 25% de los casos están causados por infartos.<sup>2</sup> La mayoría de los pacientes con infarto isquémico que se presentan con mareos o vértigo se presentan con un SVA, pero sólo aproximadamente un 20% tiene signos neurológicos focales, mientras que el resto tiene SVA aislado.<sup>1,2</sup>

A pesar de las extensas evaluaciones en el DE,<sup>3,4</sup> la precisión diagnóstica en el mareo cerebrovascular es baja (se pierden aproximadamente el 35% de los infartos).<sup>5</sup> Nosotros y otros hemos observado<sup>1,6</sup> que los infartos muy pequeños a veces causan SVA; estos son en general presentaciones aisladas de SVA, lo que aumenta potencialmente la posibilidad de no ser diagnosticados. También notamos que estos pacientes parecen tener mayor probabilidad de falsos negativos en la RM, y así aumenta aún más ese riesgo. No ha habido ningún estudio sistemático acerca de si estos infartos más pequeños causantes de SVA difieren demográficamente, en cuanto al mecanismo o en términos de pronóstico.

Del Department of Neurology (A.S.S.T., J.C.K., J.H.P., D.N.), University of Illinois College of Medicine at Peoria; y Departments of Neurology (G.M., D.F.H., D.S.Z., D.E.N.-T.) y Radiology (A.B., S.Y.), Johns Hopkins University School of Medicine, Baltimore, MD.

Ir a [Neurology.org](http://Neurology.org) para declaraciones de intereses completas. La información sobre fondos y aquellas declaraciones relevantes para los autores, si existiesen, se encuentran al final del artículo.

Las lesiones causantes de SVA central pueden estar localizadas en la raíz de la zona de entrada del octavo nervio, en el núcleo vestibular, en el nódulo o en el flóculo.<sup>7</sup> Nosotros postulamos que los infartos pequeños de fosa posterior causantes de SVA podrían llegar a involucrar estas estructuras y podrían tener una mayor tasa de falsos negativos en RM que los infartos mayores. Evaluamos la frecuencia, la distribución anatómica, las manifestaciones clínicas, las neuroimágenes y los mecanismos patológicos de estos infartos pequeños.

**MÉTODOS** Se enrolaron pacientes con SVA, que tuvieron vértigo agudo o mareos, nistagmo, náuseas o vómitos, intolerancia al movimiento cefálico y marcha inestable con uno o más factores de riesgo para infarto, en un estudio prospectivo de corte transversal de 1999 a 2011 en un único centro de referencia de infarto cerebral. Los métodos del estudio han sido descritos en detalle en otro lado.<sup>1,8,9</sup> En resumen, los pacientes fueron reclutados a través de una combinación de vigilancia pasiva (notificación de investigadores a través de médicos de emergencia) y activa (revisión de pacientes neurológicos admitidos). Los sujetos fueron examinados en la cama de forma sistemática, y se incluyó el examen HINTS (*head impulse, nystagmus, test-of-skew*; impulso cefálico, nistagmo, test de skew)<sup>1</sup> más prueba de audición por frotación de dedos (todo junto referido como HINTS “plus”).<sup>9</sup> Los exámenes en general eran previos a las neuroimágenes o los examinadores permanecían ciegos a la existencia de un infarto, para minimizar el sesgo de observador en la determinación de hallazgos en el examen físico. A todos se les hizo una neuroimagen para confirmar el diagnóstico final. En cuanto a las neuroimágenes, el 97% de los pacientes realizó una RM con secuencia de difusión (RM-DWI), mientras que el 3% tuvo grandes infartos con efecto de masa evidenciables en la TC y no estaban clínicamente estables como para realizar una RM. Se repitió la RM-DWI en pacientes con imagen inicial normal, pero signos clínicos sugestivos de lesión central. El infarto fue definido mediante una lesión brillante en DWI en una localización compatible, sin evidencia de una etiología alternativa mediante la neuroimagen, determinado por un neurorradiólogo. Se excluyó el infarto en pacientes periféricos mediante la ausencia de signos neurológicos focales (SVA aislado), una neuroimagen negativa y el seguimiento clínico.

El tamaño de la muestra para este análisis retrospectivo se basó en la disponibilidad de pacientes relevantes en nuestra base de datos para investigación. Incluimos acá a pacientes con infartos por DWI de diámetro axial  $\leq 10$  mm. La elección del punto de corte de 10 mm tuvo la intención de focalizar el análisis en infartos “pequeños”, pero indudables, por 2 razones: (1) para tener mayor certeza anatómica sobre las estructuras vestibulares específicas involucradas y (2) para identificar lesiones que podrían evocar la noción clínica de ser de alguna manera poco importantes (por ej., la presunción de un mecanismo lacunar basada solamente en el tamaño pequeño, reduciendo la probabilidad de una mayor evaluación diagnóstica del mecanismo o del uso de terapias más agresivas). El diámetro axial de los infartos con mecanismo patológico lacunar es altamente variable, debido a que la forma de los infartos lacunares es frecuentemente irregular,<sup>10</sup> por lo que la elección de 10 mm en oposición a otro diámetro específico fue de alguna manera arbitraria.

La localización anatómica de los infartos fue confirmada por 2 expertos en neuroimágenes de fosa posterior (A.B., S.Y.) y 2 otoneurólogos (D.N.-T., J.C.K.). Mostramos imágenes seleccionadas representativas de cada región anatómica involucrada. Comparamos la tasa de falsos negativos en RM con la tasa de falsos negativos del examen físico en la cama,

y comparamos estas mismas pruebas con los resultados de aquellos con infartos mayores que presentan SVA. Reportamos medidas similares para aquellos con SVA aislado. Utilizamos la prueba exacta de Fisher para comparar proporciones entre los grupos, y la prueba de Mann-Whitney no paramétrica para comparar distribuciones no-normales del tiempo hasta la RM. Se utilizaron métodos no estadísticos para imputar los datos faltantes, controlar confundidores, considerar la estrategia de muestreo o realizar análisis de sensibilidad. Los valores de  $p < 0,05$  fueron considerados estadísticamente significativos.

**Aprobaciones estándar de protocolo, registros y consentimiento de pacientes.** El estudio fue aprobado por el comité de revisión institucional. Se obtuvo un consentimiento informado por escrito de todos los participantes. Todos los pacientes reportados acá fueron incluidos en uno o más reportes previos de datos del estudio agregados.<sup>1,8,9</sup>

**RESULTADOS** De 190 presentaciones de SVA de alto riesgo, 105 fueron causados por infartos, de los cuales todos fueron revisados para conocer el tamaño de la lesión. De estos, un 14% tenían lesiones  $\leq 10$  mm (edad media 65.4 años, mediana 64, rango 41-85, 33% mujeres, 80% caucásicos, 20% afroamericanos). El tiempo desde el inicio de los síntomas a la RM fue similar para lesiones  $\leq 10$  mm (mediana 12 horas, rango intercuartil 6-48 horas) y  $> 10$  mm (mediana 12 horas, rango intercuartil 5-24 horas) (Mann Whitney  $p = 0,245$ ). Las descripciones clínico-radiológicas de los casos con localización de la lesión se muestran en la tabla 1. En la figura 1 se presenta un montaje de secciones de RM de cerebro representativas. La estructura vestibular más frecuentemente involucrada fue el pedúnculo cerebeloso inferior (73%). La localización más frecuentemente afectada fue el bulbo lateral (60%); llamativamente, sin embargo, dos tercios de estos se presentaron inicialmente con un SVA aislado y ninguno presentó un síndrome de Wallenberg completo. En sólo un caso se encontró un infarto cerebeloso aislado.

En sólo un 27% la presentación inicial fueron signos neurológicos generales no oculomotores (tabla 1). La prueba HINTS “plus” identificó infartos cerebrales pequeños en el SVA con una sensibilidad mayor que la RM con difusión temprana (100% vs 47% [n = 7/15],  $p < 0,001$ ), y más en aquellos con SVA aislado (100% vs 36% [n = 4/11],  $p < 0,001$ ). Las RM con falsos negativos en pequeños infartos cerebrales se dieron 6-48 horas luego del inicio de los síntomas vestibulares. La sensibilidad por imagen de la anatomía varió según el tamaño del infarto (47% pequeños vs 92% grandes), a pesar de una duración similar de los síntomas antes de la RM, mientras que los exámenes clínicos basados en la fisiología no variaron (100% pequeños vs 99% grandes) (tabla 2). La prueba de impulso cefálico fue anormal (lo que sugiere erróneamente una lesión periférica benigna) en 2 casos pontinos (pacientes 11 y 12), pero la presencia de otros signos (nistagmo con cambio de dirección y skew en el paciente 11, y pérdida auditiva y parálisis facial en paciente 12) localizaron correctamente la lesión. Mecanismos de infarto cerebral no lacunares fueron responsables del evento en el 47% de los casos (tabla 1).

**Tabla 1** Descripciones clínico-radiológicas de los casos, enumeradas de caudal a rostral, sobre la base de la localización anatómica de la lesión

| Paciente | Edad, años | Sexo | Signos craneales/tracto          | HINTS |                                             |         | 1era RM | Localización (estructura vestibular)                    | Etiología <sup>a</sup> |
|----------|------------|------|----------------------------------|-------|---------------------------------------------|---------|---------|---------------------------------------------------------|------------------------|
|          |            |      |                                  | HIT   | Nistagmo horizontal con cambio de dirección | Oblicuo |         |                                                         |                        |
| 1        | 61         | F    | Pin reducido facial D, cuerpo I  | -     | -                                           | +       | Normal  | Bulbo intermediolateral D (PCI)                         | Lacunar                |
| 2        | 85         | M    | Ninguno                          | -     | Sin nistagmo                                | +       | Infarto | Bulbo intermediolateral D (PCI)                         | Lacunar                |
| 3        | 67         | M    | Ninguno                          | -     | -                                           | -       | Normal  | Bulbo intermediolateral I (PCI)                         | Lacunar                |
| 4        | 41         | M    | Ninguno (evolucionó luego)       | -     | +                                           | +       | Normal  | Bulbo intermediolateral D (PCI)                         | Disección AV           |
| 5        | 75         | M    | Adormecimiento facial D          | -     | Sin nistagmo                                | +       | Infarto | Bulbo posterolateral I (PCI)                            | Oclusión AV            |
| 6        | 51         | F    | Disfagia                         | -     | -                                           | -       | Infarto | Bulbo posterolateral D (PCI)                            | Oclusión AV            |
| 7        | 83         | M    | Ninguno                          | -     | Sin nistagmo                                | -       | Normal  | Bulbo posterolateral D (PCI)                            | Fibrilación auricular  |
| 8        | 61         | F    | Ninguno                          | -     | Sin nistagmo                                | -       | Infarto | Bulbo posterolateral I (PCI, NVM)                       | Lacunar                |
| 9        | 71         | M    | Nistagmo hacia arriba            | -     | NA (vertical)                               | -       | Normal  | Bulbo intermedio/posterolateral D (PCI, NVM)            | Oclusión AV            |
| 10       | 64         | M    | Ninguno                          | -     | -                                           | +       | Normal  | Bulboprotuberancial I, periventricular lateral (PCI)    | Lacunar                |
| 11       | 80         | M    | Reacción ocular tilt             | +     | +                                           | +       | Normal  | Bulboprotuberancial D, periventricular medial (NVM)     | Disección AV           |
| 12       | 58         | F    | Parálisis facial I; hipoacusia I | +     | -                                           | -       | Infarto | Protuberancia lateral I (entrada raíces 8vo nervio)     | Lacunar                |
| 13       | 62         | M    | Nistagmo hacia arriba            | -     | NA (vertical)                               | +       | Normal  | Periventricular I (PCI)                                 | Lacunar                |
| 14       | 50         | F    | Nistagmo de torsión/hacia abajo  | -     | NA (vertical)                               | -       | Infarto | Periventricular D (nódulo)                              | Oclusión bilateral AV  |
| 15       | 70         | M    | Reacción ocular tilt             | -     | Sin nistagmo                                | +       | Infarto | Techo mesencéfalo D (posible NIC o conexiones cercanas) | Lacunar                |

Abreviaturas: AV = arteria vertebral; HINTS = impulso cefálico, nistagmo, test de skew; HIT = *head impulse test* (prueba de impulso cefálico); NIC = núcleo intersticial de Cajal; NVM = núcleo vestibular medial; NA = no aplicable; PCI = pedúnculo cerebeloso inferior; Pin = sensibilidad al pinchazo

Símbolos: + = presente/anormal; - = ausente/normal.

<sup>a</sup>Las etiologías fueron asignadas sobre la base de los criterios clínico-radiológicos luego de una batería intensa de pruebas estandarizadas para el infarto cerebral. Ninguno tuvo confirmación patológica.

**DISCUSIÓN** Se encontraron infartos cerebrales pequeños causantes de SVA a lo largo del tronco encefálico, aunque en forma desproporcionada en el bulbo lateral y el pedúnculo cerebeloso inferior; las lesiones cerebelosas aisladas fueron poco frecuentes en nuestra serie. Aproximadamente tres cuartos de los pacientes tuvieron una presentación de SVA aislado, y el examen clínico fue altamente superior en la detección de lesiones centrales que la RM temprana. Aproximadamente la mitad tuvieron mecanismos no lacunares, incluso 6 casos de disección u oclusión de la arteria vertebral. Estos resultados agregan conocimiento a lo que ya se sabe sobre presentación vestibular aislada en infartos cerebrales y tiene importantes implicancias en la práctica clínica.

Históricamente, el vértigo aislado no fue considerado un síntoma de infarto cerebral<sup>11</sup> y, por protocolo, esta presentación clínica ha sido sistemáticamente excluida de la mayoría de los estudios formales sobre infarto cerebral.<sup>12,13</sup> Investigaciones recientes, sin embargo, dejan en claro que el vértigo aislado, ya sea transitorio<sup>13</sup> o persistente,<sup>1,2,8</sup> es una presentación común de AIT o infarto cerebral de territorio posterior. De hecho, cuando los pacientes cerebrovasculares presentan síntomas vestibulares, son mucho más frecuentemente aislados que no aislados en su presentación inicial,<sup>1,13</sup> y el vértigo aislado o el mareo son la manifestación inicial más común de la isquemia vértebro-basilar.<sup>13</sup>

Mientras que el vértigo aislado transitorio todavía presenta desafíos diagnósticos importantes, hay mucha evidencia ahora que indica que el examen físico oculomotor en la cama distingue de forma confiable causas centrales de periféricas en aquellos con síntomas continuos y persistentes (por ej., SVA).<sup>1,2,8,9,14</sup> El único paciente en esta serie que no identificó el HINTS, hubiera sido captado con el recientemente descrito HINTS “plus”, que identifica a la pérdida auditiva como un signo de infarto de la arteria cerebelosa anteroinferior en pacientes con SVA.<sup>9</sup> En manos de subespecialistas, el HINTS “plus” tiene una sensibilidad y una especificidad estimadas de 99% y 97%, respectivamente, para identificar causas centrales de SVA, ya sea aislado o no.<sup>9</sup> Resultados similares, sin embargo, pueden obtenerse en neurólogos generales luego de un modesto entrenamiento.<sup>15</sup>

Probablemente no sea suficiente confiar en una RM inmediata para excluir pacientes con SVA debido a un infarto cerebral. En nuestra práctica clínica, no aceptamos una RM negativa de < 72 horas luego del inicio de los síntomas como algo definitivo, si los signos oculomotores sugieren otra cosa, y repetimos la imagen en esos pacientes como rutina. Para reducir la necesidad de RM repetidas, a veces puede ser apropiado esperar 48-72 horas luego del inicio de los síntomas para obtener la primera RM (por ej., si la etiología del infarto es conocida y el

**Figura 1** Montaje de lesiones causales en 9 de los 15 pacientes con infartos cerebrales pequeños que causaron síndrome vestibular agudo

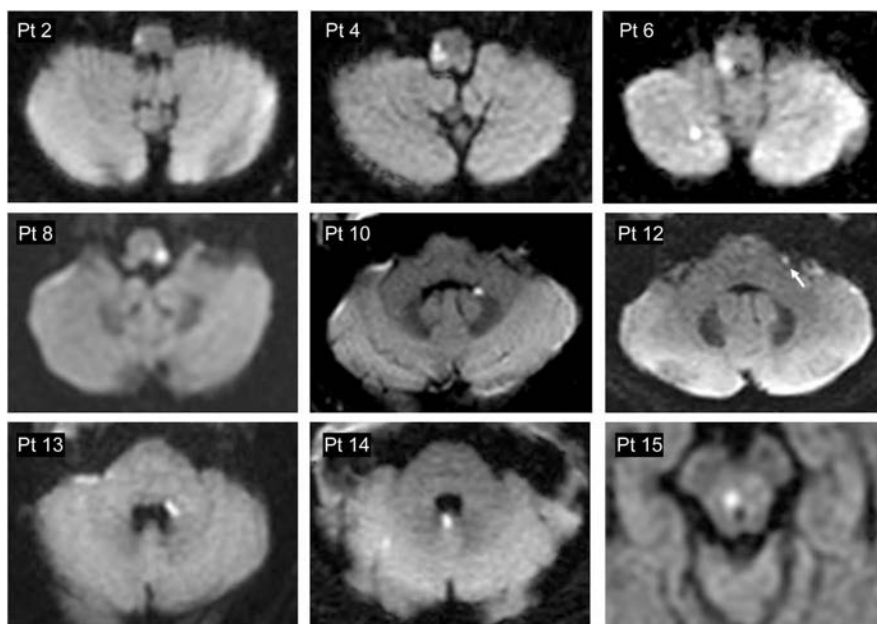

Montaje de lesiones causales en 9 de los 15 pacientes con infartos cerebrales pequeños que causaron síndrome vestibular agudo (RM/secuencia de difusión a través del tronco encefálico, de caudal a rostral). Sólo se muestran imágenes seleccionadas representativas de cada región anatómica involucrada.

paciente está clínicamente estable). Lo óptimo sería continuar con estudios sobre protocolos de neuroimágenes en el SVA basados en evidencia, aunque recientemente propusimos una posible estrategia.<sup>9</sup>

El pronóstico y el impacto del tratamiento temprano para estos pacientes específicos todavía se desconoce, pero el diagnóstico preciso parecería ser bastante importante. La probabilidad de recurrencia de infarto o muerte es mayor con mecanismos no lacunares que lacunares.<sup>16</sup> Las oclusiones o disecciones vertebrobasilares se encuentran en más de la mitad de los pacientes con SVA,<sup>1</sup> y fueron vistas en el 40% de la presente serie de infartos pequeños. La disección es más frecuente en adultos jóvenes en poblaciones de infarto cerebral no seleccionadas,<sup>17</sup> y ser joven es un factor de riesgo para no identificar un infarto cerebral.<sup>18</sup> Los pacientes con infarto cerebral de la circulación posterior mal diagnosticados parecen tener peor evolución que aquellos con diagnóstico y tratamiento temprano.<sup>2</sup> Las disecciones generalmente no se sospechan y pueden ser difíciles de detectar, pero la evolución clínica de

una disección de arteria vertebral no diagnosticada en pacientes jóvenes puede ser desastrosa.<sup>19</sup> El tratamiento óptimo para la estenosis y disección vertebrobasilar sigue siendo controvertida, y los ensayos clínicos están intentando determinar si la trombolisis temprana es beneficiosa en aquellos con infartos de circulación posterior no incapacitante. Ante la falta de evidencia por ensayos clínicos, sin embargo, en nuestra práctica clínica tratamos a los pacientes con SVA aislado y hallazgos sospechosos en el HINTS o pérdida de audición reciente, con la misma urgencia que otros infartos cerebrales no incapacitantes (por ej., internación y enfoque como un paciente con factor de riesgo de infarto cerebral). El diagnóstico preciso de estos infartos cerebrales mediante el examen HINTS podría potencialmente salvar vidas y reducir la discapacidad a través de una intervención temprana. Por lo menos, la detección temprana podría llevar al estudio de nuevas terapias para el infarto de circulación posterior que podrían ser aplicadas a este grupo subestudiado de infartos de fosa posterior.

**Tabla 2** Evaluación oculomotora y por neuroimagen en infartos cerebrales pequeños vs grandes presentándose con SVA

|                                                                             | Infartos cerebrales pequeños (≤ 10 mm), % (n de 15) | Infartos cerebrales grandes (> 10 mm), % (n de 90) | Valor de p |
|-----------------------------------------------------------------------------|-----------------------------------------------------|----------------------------------------------------|------------|
| Falso-negativo en RM inicial <sup>a</sup>                                   | 53,3 (8)                                            | 7,8 (7)                                            | < 0,001    |
| Falso-negativo en examen HINT                                               | 6,7 (1)                                             | 3,3 (3)                                            | 0,46       |
| Falso-negativo en el examen HINT "plus" con examen de audición <sup>b</sup> | 0 (0)                                               | 1,1 (1)                                            | 1          |

Abreviaturas: HINTS = impulso cefálico, nistagmo, test de skew; SVA = síndrome vestibular agudo.

<sup>a</sup> Todos los infartos cerebrales fueron confirmados por RM con secuencia de difusión. Para falsos negativos en la primera RM, se obtuvieron nuevas imágenes varios días después de la primera imagen falso-negativa.

Nuestras limitaciones incluyen el tamaño pequeño de la muestra, la captura deficiente de casos (se pueden haber perdido en la segunda RM infartos pequeños o en pacientes con SVA aislado a los cuales se los siguió como periférico y no se les hizo una imagen repetida), y las consecuencias desconocidas de la falta de diagnóstico (ya que reportamos sólo aquellos con correcto diagnóstico). Si los infartos pequeños fueron clasificados como periféricos (por ej., no incluidos aquí), los resultados pueden haber sobreestimado la sensibilidad del HINTS; sin embargo, la sensibilidad de la RM también habría sido sobreestimada, por lo que no es plausible que esta limitación hubiese anulado la ventaja de la gran sensibilidad del HINTS sobre la RM. Algunas localizaciones anatómicas conocidas como causantes de SVA no fueron incluidas aquí (por ej., no hay casos de lesiones de la corteza insular hemisférica<sup>7</sup> o lesiones del tegmento pontino dorsolateral con paresia maseterina asociada<sup>20</sup>). En teoría, nuestros resultados no podrían generalizarse a infartos en estos otros sitios.

Los infartos cerebrales pequeños que involucran las proyecciones vestibulares en el tronco encefálico o el cerebelo pueden producir SVA. Estos pacientes tienen con más frecuencia infartos bulbares laterales sin signos clásicos. El examen HINTS “plus” de pruebas oculomotoras identifica estos pacientes con mayor precisión que una RM-DWI, que da un falso negativo en más de la mitad. Encontramos mecanismos no lacunares en aproximadamente la mitad de los pacientes, esto sugiere un riesgo mayor al asumido en pacientes con infartos tan pequeños. Estudios futuros deberían intentar determinar si el diagnóstico temprano de estos pacientes mejora la evolución clínica.

#### CONTRIBUCIONES DE LOS AUTORES

Ali S. Saber Tehrani: borrador del manuscrito, revisión y edición crítica del manuscrito, y aprobación de la versión final. Jorge C. Kattah: asistencia en la recolección de datos, revisión y edición crítica del manuscrito, y aprobación de la versión final. Georgios Mantokoudis: revisión y edición crítica del manuscrito, y aprobación de la versión final. John H. Pula y Deepak Nair: asistencia en la recolección de datos, revisión y edición crítica del manuscrito, y aprobación de la versión final. Ari Blitz y Sarah Ying: asistencia en la recolección de datos, revisión y edición crítica del manuscrito, y aprobación de la versión final. Daniel F. Hanley y David S. Zee: asistencia en el diseño y concepción del estudio, revisión y edición crítica del manuscrito, y aprobación de la versión final. David E. Newman-Toker: diseño del estudio y plan analítico; revisión y edición crítica del manuscrito, y aprobación de la versión final.

#### FONDOS PARA EL ESTUDIO

No se reportan aportes de fondos.

#### DECLARACIÓN DE INTERESES

Los autores no reportan intereses relevantes a este estudio. Ir a [Neurology.org](http://neurology.org) para declaraciones completas.

*Recibido el 11 de diciembre de 2013. Aceptado en su formato final el 26 de marzo de 2014.*

#### BIBLIOGRAFÍA

1. Kattah JC, Talkad AV, Wang DZ, Hsieh YH, Newman-Toker DE. HINTS to diagnose stroke in the acute vestibular syndrome: three-step bedside oculomotor exami-

nation more sensitive than early MRI diffusion-weighted imaging. *Stroke* 2009;40:3504–3510.

2. Tarnutzer AA, Berkowitz AL, Robinson KA, Hsieh YH, Newman-Toker DE. Does my dizzy patient have a stroke? A systematic review of bedside diagnosis in acute vestibular syndrome. *CMAJ* 2011;183:E571–E592.
3. Saber Tehrani AS, Coughlan D, Hsieh YH, et al. Rising annual costs of dizziness presentations to US emergency departments. *Acad Emerg Med* 2013;20:689–696.
4. Kim AS, Sidney S, Klingman JG, Johnston SC. Practice variation in neuroimaging to evaluate dizziness in the ED. *Am J Emerg Med* 2012;30:665–672.
5. Kerber KA, Brown DL, Lisabeth LD, Smith MA, Morgenstern LB. Stroke among patients with dizziness, vertigo, and imbalance in the emergency department: a population-based study. *Stroke* 2006;37:2484–2487.
6. Kim HJ, Lee SH, Park JH, Choi JY, Kim JS. Isolated vestibular nuclear infarction: report of two cases and review of the literature. *J Neurol* 2014;261:121–129.
7. Kim HA, Lee H. Recent advances in central acute vestibular syndrome of a vascular cause. *J Neurol Sci* 2012;321:17–22.
8. Newman-Toker DE, Kattah JC, Alvernia JE, Wang DZ. Normal head impulse test differentiates acute cerebellar strokes from vestibular neuritis. *Neurology* 2008;70:2378–2385.
9. Newman-Toker D, Kerber K, Hsieh Y, et al. HINTS outperforms ABCD2 to screen for stroke in acute continuous vertigo and dizziness. *Acad Emerg Med* 2013;20:986–996.
10. Herve D, Mangin JF, Molko N, Bousser MG, Chabriat H. Shape and volume of lacunar infarcts: a 3D MRI study in cerebral autosomal dominant arteriopathy with subcortical infarcts and leukoencephalopathy. *Stroke* 2005;36:2384–2388.
11. Fisher CM. Vertigo in cerebrovascular disease. *Arch Otolaryngol* 1967;85:529–534.
12. A classification and outline of cerebrovascular diseases: II. *Stroke* 1975;6:564–616.
13. Paul NL, Simoni M, Rothwell PM. Transient isolated brainstem symptoms preceding posterior circulation stroke: a population-based study. *Lancet Neurol* 2013;12:65–71.
14. Huh YE, Koo JW, Lee H, Kim JS. Head-shaking aids in the diagnosis of acute audiovestibular loss due to anterior inferior cerebellar artery infarction. *Audiol Neurootol* 2013;18:114–124.
15. Chen L, Lee W, Chambers BR, Dewey HM. Diagnostic accuracy of acute vestibular syndrome at the bedside in a stroke unit. *J Neurol* 2011;258:855–861.
16. Jackson C, Sudlow C. Comparing risks of death and recurrent vascular events between lacunar and non-lacunar infarction. *Brain* 2005;128:2507–2517.
17. Gottesman RF, Sharma P, Robinson KA, et al. Clinical characteristics of symptomatic vertebral artery dissection: a systematic review. *Neurologist* 2012;18:245–254.
18. Newman-Toker DE, Moy E, Valente E, Coffey R, Hines A. Missed diagnosis of stroke in the emergency department: a cross-sectional analysis of a large population-based sample. *Diagnosis* 2014. Available at: <http://www.degruyter.com/view/j/dx.2014.1.issue-2/dx-2013-0038/dx-2013-0038.xml>. Accessed May 23, 2014.
19. Savitz SI, Caplan LR, Edlow JA. Pitfalls in the diagnosis of cerebellar infarction. *Acad Emerg Med* 2007;14:63–68.
20. Hopf HC. Vertigo and masseter paresis: a new local brainstem syndrome probably of vascular origin. *J Neurol* 1987;235:42–45.
